# Supplementary material for: Interconnections between the Cation/Alkaline pH-Responsive Slt and the Ambient pH Response of PacC/Pal Pathways in Aspergillus nidulans
Source: MDPI journal article supplement (doi:10.3390/cells13070651), 2024-04-08

## Supplementary Material

**Supplementary Table S1:** Strains used in this study

| Strain         | Genotype                                                                                                                                                  | Reference                               |
|----------------|-----------------------------------------------------------------------------------------------------------------------------------------------------------|-----------------------------------------|
| <b>MAD973</b>  | <i>yA2, pabaA1, argB2, pacC<sup>C</sup>700</i>                                                                                                            | CIB's stock collection                  |
| <b>MAD1132</b> | <i>wA3, sltA1, pantoB100</i>                                                                                                                              | CIB's stock collection                  |
| <b>MAD1445</b> | <i>yA2, pabaA1, pacC<sup>C</sup>14900</i>                                                                                                                 | Hervás-Aguilar et al., (2007)           |
| <b>MAD1652</b> | <i>yA2, pabaA1, pacX20, pacC900</i>                                                                                                                       | Bussink et al.,(2015)                   |
| <b>MAD1775</b> | <i>pyrG89, pyroA4, inoB2, nkuAΔ::bar, palBΔ::pyroA, pacC900</i>                                                                                           | CIB's stock collection                  |
| <b>MAD1929</b> | <i>pyroA4, pacX-gfp, hhoA-mrfp, riboB2</i>                                                                                                                | CIB's stock collection                  |
| <b>MAD2352</b> | <i>wA4, pyrG89, pyroA4, inoB2, nkuAΔ::bar, palF::ha<sub>3</sub>::pyrG<sup>Af</sup>, pacC900</i>                                                           | Bussink et al.,(2015)                   |
| <b>MAD3367</b> | <i>pantoB100, vps23::gfp::pyrG<sup>Af</sup></i>                                                                                                           | Galindo et al., (2012)                  |
| <b>MAD3369</b> | <i>pyroA4, palF15, vps23::gfp::pyG<sup>Af</sup></i>                                                                                                       | Galindo et al., (2012)                  |
| <b>MAD3419</b> | <i>inoB2, pacC900, sltA60</i>                                                                                                                             | CIB's stock collection                  |
| <b>MAD3652</b> | <i>pyrG89, pabaA1, argB2, nkuAΔ::argB, sltA::ha<sub>3</sub>::pyrG<sup>Af</sup>, riboB2</i>                                                                | Mellado et al., (2016)                  |
| <b>MAD3693</b> | <i>pyrG89, pabaA1, argB2, nkuAΔ::argB, sltA::ha<sub>3</sub>::pyrG<sup>Af</sup>, riboB2, sltBΔ::riboB<sup>Af</sup></i>                                     | Mellado et al., (2016)                  |
| <b>MAD3816</b> | <i>sltAΔ::pyrG<sup>Af</sup>, pyroA4, riboB2, argB2, nkuAΔ::argB</i>                                                                                       | Mellado et al., (2016)                  |
| <b>MAD3919</b> | <i>pyrG89, pabaB22, nkuAΔ::argB (argB2), sltA::ha<sub>3</sub>::riboB<sup>Af</sup>, riboB2</i>                                                             | Mellado et al., (2015)                  |
| <b>MAD4296</b> | <i>yA2, biA1, pabaA1, pyrG89, sltAΔ::pyrG<sup>Af</sup>, argB2, pacC<sup>C</sup>14900</i>                                                                  | Mellado et al., (2016)                  |
| <b>MAD4499</b> | <i>pabaA1, pantoB100, pyroA4::[ gpdA<sup>mini</sup>::palF (cDNA)::ha<sub>3</sub>::ub::pyroA<sup>trunc</sup>], pacC900</i>                                 | CIB's stock collection                  |
| <b>MAD5736</b> | <i>pyrG89, pyroA4</i>                                                                                                                                     | CIB's stock collection                  |
| <b>MAD6669</b> | <i>pyrG89, pabaB22, nkuAΔ::argB(argB2), riboB2, sltA::ha<sub>3</sub>::riboB<sup>Af</sup></i>                                                              | Picazo et al., (2020)                   |
| <b>MAD7621</b> | <i>nkuAΔ::argB(argB2)?, sltAΔ::pyrG<sup>Af</sup>, pacX20</i>                                                                                              | This work. From cross MAD3816 x MAD1652 |
| <b>MAD7622</b> | <i>wA3, sltA1, pacX20</i>                                                                                                                                 | This work. From cross MAD1132 x MAD1652 |
| <b>MAD7623</b> | <i>yA2, pyrG89?, pabaA1?, pabaB22?, nkuAΔ::argB(argB2)?, sltBΔ::riboB<sup>Af</sup>, sltA::ha<sub>3</sub>::pyrG<sup>Af</sup>, pacX20, pacC900, riboB2?</i> | This work. From cross MAD3693 x MAD1652 |
| <b>MAD7624</b> | <i>nkuAΔ::argB(argB2)?, pacX20, sltA::ha<sub>3</sub>::riboB<sup>Af</sup></i>                                                                              | This work. From cross MAD6669 x MAD1652 |
| <b>MAD7625</b> | <i>pyrG89?, pyroA4, nkuAΔ::argB(argB2)?, sltAΔ::riboB<sup>Af</sup>, pacX-gfp, hhoA-mrfp, riboB2?</i>                                                      | This work. From cross MAD1929 x MAD3919 |

|                |                                                                                                                                                                                                                               |                                         |
|----------------|-------------------------------------------------------------------------------------------------------------------------------------------------------------------------------------------------------------------------------|-----------------------------------------|
| <b>MAD7626</b> | <i>pyrG89?</i> , <i>pyroA4</i> , <i>nkuAΔ::argB(argB2)?</i> , <i>pacX-gfp</i> , <i>hhoA-mrfp</i> , <i>riboB2</i>                                                                                                              | This work. From cross MAD1929 x MAD3919 |
| <b>MAD7627</b> | <i>wA4</i> , <i>nkuAΔ::argB(argB2)?</i> , <i>nkuAΔ::bar?</i> , <i>pacC900</i> , <i>palF500</i>                                                                                                                                | This work. From cross MAD7621 x MAD2352 |
| <b>MAD7628</b> | <i>pyroA4</i> , <i>inoB2</i> , <i>nkuAΔ::argB(argB2)?</i> , <i>nkuAΔ::bar?</i> , <i>pacX20</i> , <i>pacC900</i> , <i>palF500</i>                                                                                              | This work. From cross MAD7621 x MAD2352 |
| <b>MAD7629</b> | <i>wA4</i> , <i>pyroA4</i> , <i>nkuAΔ::argB(argB2)?</i> , <i>nkuAΔ::bar?</i> , <i>sltAΔ::pyrG<sup>Af</sup></i> , <i>pacX20</i> , <i>pacC900</i> , <i>palF500</i>                                                              | This work. From cross MAD7621 x MAD2352 |
| <b>MAD7630</b> | <i>pyroA4</i> , <i>nkuAΔ::argB(argB2)?</i> , <i>nkuAΔ::bar?</i> , <i>sltAΔ::pyrG<sup>Af</sup></i> , <i>pacC900</i> , <i>palF500</i>                                                                                           | This work. From cross MAD7621 x MAD2352 |
| <b>MAD7631</b> | <i>wA4</i> , <i>pyroA4</i> , <i>inoB2</i> , <i>nkuAΔ::argB(argB2)?</i> , <i>nkuAΔ::bar?</i> , <i>sltAΔ::pyrG<sup>Af</sup></i> , <i>pacC900</i>                                                                                | This work. From cross MAD7621 x MAD2352 |
| <b>MAD7632</b> | <i>pyroA4</i> , <i>pabaA1</i> , <i>nkuAΔ::argB(argB2)?</i> , <i>argB2?</i> , <i>pacC<sup>C</sup>700</i> , <i>riboB2</i>                                                                                                       | This work. From cross MAD973 x MAD3816  |
| <b>MAD7633</b> | <i>yA2</i> , <i>pyroA4</i> , <i>pabaA1</i> , <i>nkuAΔ::argB(argB2)?</i> , <i>argB2?</i> , <i>sltAΔ::pyrG<sup>Af</sup></i> , <i>pacC<sup>C</sup>700</i> , <i>riboB2</i>                                                        | This work                               |
| <b>MAD7634</b> | <i>wA4</i> , <i>inoB2</i> , <i>nkuAΔ::argB(argB2)?</i> , <i>nkuAΔ::bar?</i> , <i>sltAΔ::pyrG<sup>Af</sup></i> , <i>pacC900</i> , <i>pyroA4::[gpdA<sup>mini</sup>::palF (cDNA)::ha<sub>3</sub>::ub::pyroA<sup>trunc</sup>]</i> | This work                               |
| <b>MAD7669</b> | <i>pyrG89</i> , <i>pyroA4</i> , <i>nkuAΔ::bar</i> , <i>vps23::gfp::pyrG<sup>Af</sup></i>                                                                                                                                      | This work                               |
| <b>MAD7670</b> | <i>pyrG89</i> , <i>pabaB22</i> , <i>nkuAΔ::bar</i> , <i>sltAΔ::riboB<sup>Af</sup></i> , <i>riboB2</i> , <i>vps23::gfp::pyrG<sup>Af</sup></i>                                                                                  | This work                               |
| <b>MAD7671</b> | <i>wA3</i> , <i>pantoB100</i> , <i>pacC900</i> , <i>pacX20</i> , <i>sltA1</i>                                                                                                                                                 | This work. From cross MAD1132 x MAD1652 |
| <b>MAD8108</b> | <i>pyrG89</i> , <i>nkuAΔ::bar</i> , <i>pyroA4</i> , <i>inoB2</i> , <i>palBΔ::pyroA</i> , <i>sltAΔ::pyrG<sup>Af</sup></i>                                                                                                      | This work                               |

**Supplementary Table S2:** Oligonucleotides used in quantitative PCR experiments

| <b>Primer</b> | <b>Sequence (5'-3')</b>  |
|---------------|--------------------------|
| qPCR_slmA_1   | TCCTCAGCAACAGACTACCTCGC  |
| qPCR_slmA_2   | CAAGATCGAACGGTTCAGACGG   |
| qPCR_slkB_1   | ATCAACCAGGATCGCTTAGACGC  |
| qPCR_slkB_2   | GTACGTTCAACATCGTCAACGC   |
| qPCR_pacC_1   | CTACATTGCCAACCGTCTTGAGC  |
| qPCR_pacC_2   | GGGATACATCACACTGTCCTCGG  |
| qPCR_palF_1   | CTCTTGCCCTAGTCAACCTCCGTG |
| qPCR_palF_2   | CGCTCCAACCTCTGTTTATCCTC  |
| qPCR_pacX_1   | TCAGCAGTAAGGGAGGTGTCTCC  |
| qPCR_pacX_2   | GATCCTGATCCCGCTCCATATC   |
| qPCR_benA_1   | AGATGCGCAACATCCAGAGC     |
| qPCR_benA_2   | CTGGTACTCGGAGACGAGATCG   |

## Supplementary figures

**Figure S1: Gene expression profiles in wild-type and *s/tAΔ* strains grown under stress caused by high extracellular sodium concentration.** A) Expression profiles of *s/tA* and *s/tB* genes in mycelia of wild-type strain grown in standard culture condition (Control, C) and then transferred to medium containing 1 M NaCl. Panels B and C show the expression levels of *pacC* (B) and *palf* (C) genes in mycelia from wild-type and null *s/tA* strains grown in non-stressing condition (Control, C) and in the presence of 1 M NaCl. Wild-type and null *s/tA* strains used in this experiment were MAD3652 and MAD3816, respectively. Error bars represent the standard deviations of three replicates for each sample result. \*,  $P < 0.01-0.05$ ; \*\*,  $P < 0.001-0.01$ ; \*\*\*,  $P < 0.0001-0.001$ ; \*\*\*\*,  $P < 0.00001$ . Not significant P-values ( $\geq 0.05$ ) are not indicated in graphs.

**Figure S2: Patterns of PacC proteolysis at alkaline pH along extended experimental times and with calcium supplementation.** A) Detection of PacC forms in ambient alkaline pH along 4 hours in wild-type and *s/tAΔ* strains. Strains and methodology used are the same as in Figure 2. Exploring longer experimental times aimed to detect a delayed proteolytic processing of PacC<sup>72kDa</sup> after medium alkalinisation in the absence of SltA activity. B) Similarly, the effect of 10 mM CaCl<sub>2</sub> was studied on the pattern of proteolytic processing of in the wild-type and null *s/tA* backgrounds. Neither longer exposure to alkaline pH nor addition of calcium modified the pattern of PacC proteolysis observed in the null *s/tA* mutant. C) Detection of PacC protein forms in the *s/tA60* mutant background (MAD3419) at alkaline pH. The mild loss-of-function phenotype caused by *s/tA60* allele allowed the detection of PacC<sup>53kDa</sup> form and recovered higher levels of PacC<sup>27kDa</sup> with a correct electrophoretic mobility although notable levels of PacC<sup>72kDa</sup> were observed compared to a wild-type background (see text for details).

**Figure S3: Characterization of the zinc binuclear cluster protein PacX.** A) Analysis of expression levels of PacX-GFP and degradation forms in WT and null *sltA* background at pH 8. On the right, relative quantification of protein levels of PacX and degraded PacX (PacX deg). B) *In vivo* detection of PacX-GFP protein by fluorescence microscopy. Nuclei were detected by tagging histone 1 (HhoA) with monomeric red fluorescent protein (mRFP). Cells were visualised in control condition and after 15 and 120 minutes of alkalinity induction. PacX-GFP cellular localisation was not altered in any strain or condition tested.

**Figure S4: Effects of *pacX20* mutation in PacC protein levels and proteolytic processing.** A) Comparative immunodetection of PacC forms in *wild-type*, *sltAΔ* (top) and *pacX20* single mutants and the double mutant *sltAΔ pacX20* (bottom). Exposure times were comparable and images highlight the positive effect of *pacX20* mutation on PacC levels. B) Lack of effect of *pacX20* mutation on the incorrect processing of PacC in *sltAΔ*, *sltBΔ* and *sltA1* mutant backgrounds.

FigureS1

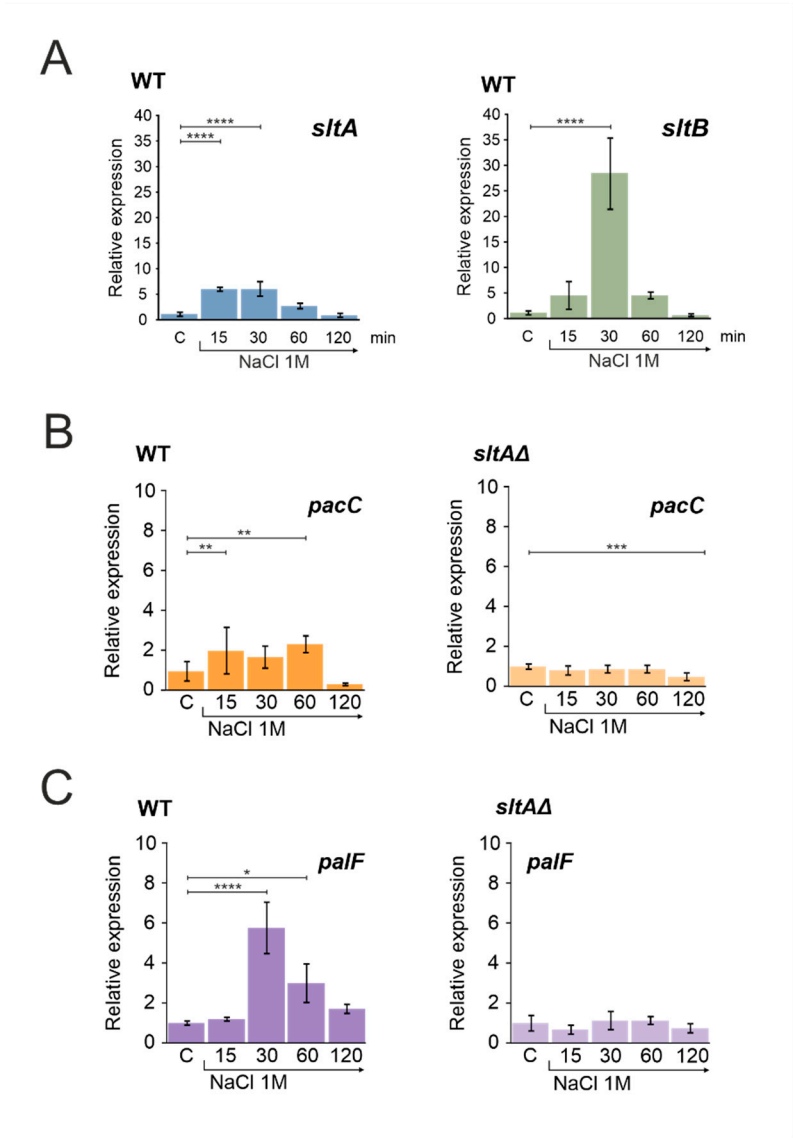

FigureS2

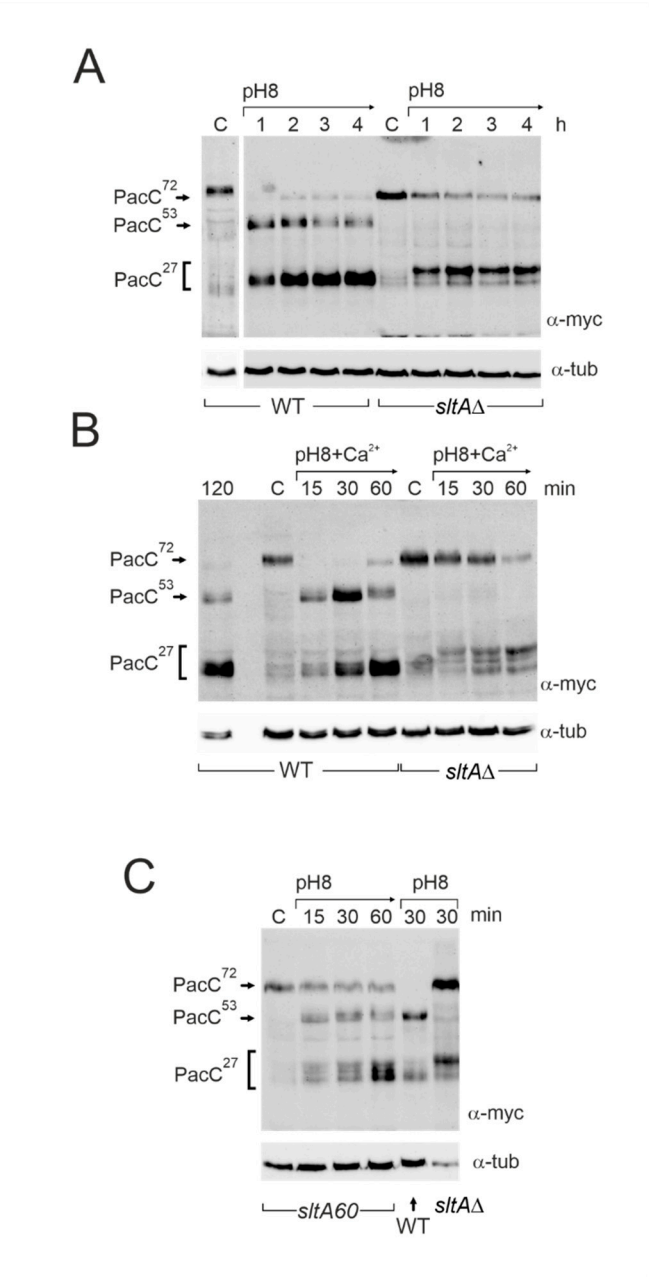

FigureS3

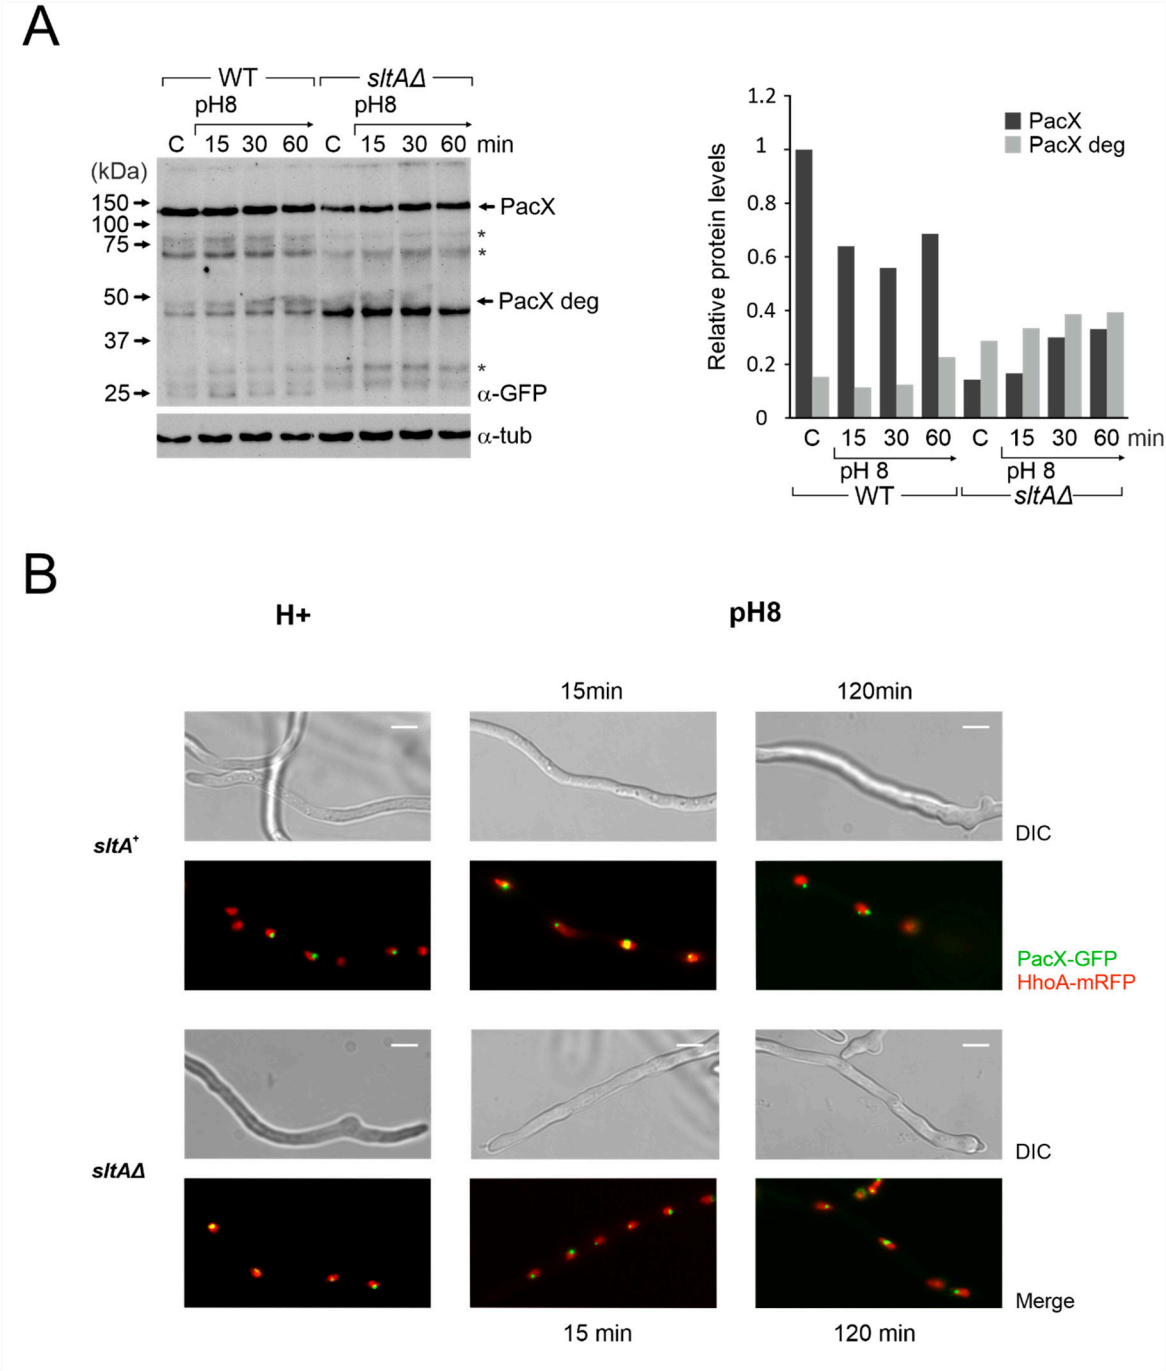

FigureS4

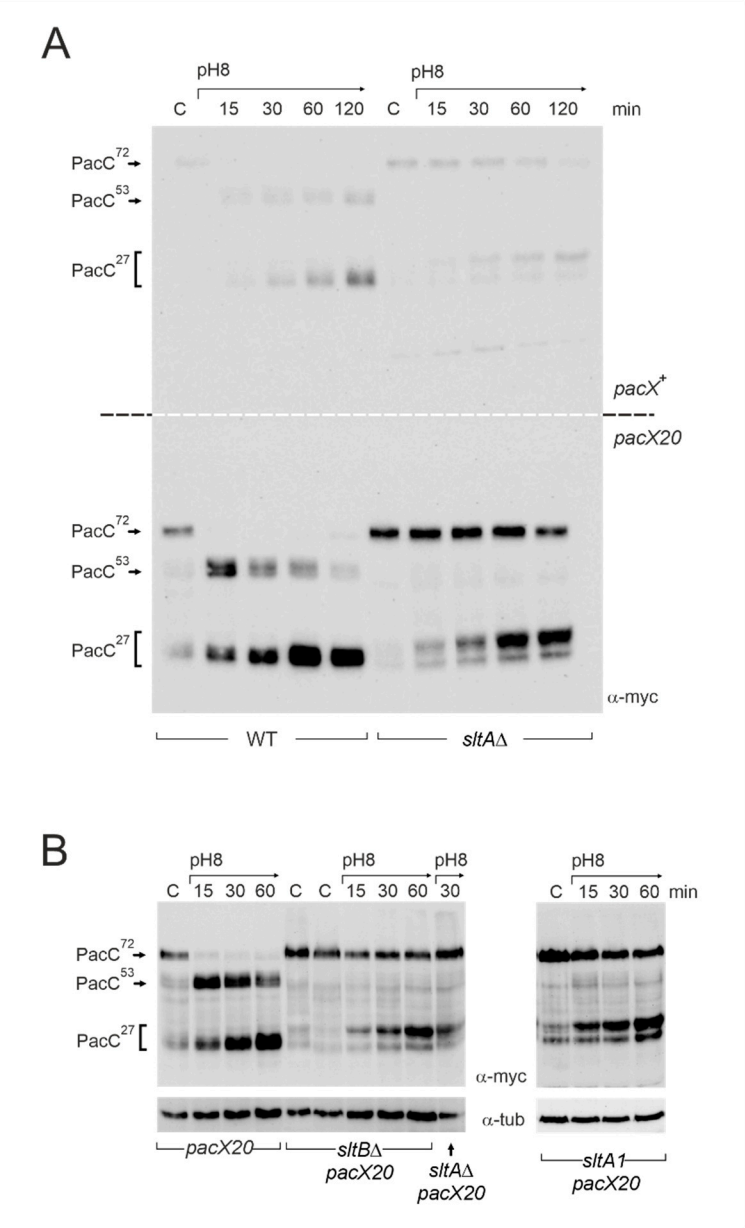

Supplement: s1 [file s1]
